# Supplementary material
Source: Springer Nature journal article supplement (https://www.springermedizin.de/resource/supplementary/13229_2012_53_MOESM1_ESM.pdf/9676120)
Supplement: MOESM1 [file 9676120]

Supplementary Table 1 primers used for RT-PCR

| Name                  | Sequence                | Type |
|-----------------------|-------------------------|------|
| <i>RT-Slc38a1-For</i> | GCCATCTTTGGGTA CTTGAC   | cDNA |
| <i>RT-Slc38a1-Rev</i> | GTGCTCTGGTA CTTGTGA     | cDNA |
| <i>RT-Nrep-For</i>    | CTAAGGAAGTGAACCGAAAGAAG | cDNA |
| <i>RT-Nrep-Rev</i>    | GGTAGCTGGAGAGGTGAAT     | cDNA |
| <i>RT-Egr1-For</i>    | TCACCTATACTGGCCGCTTC    | cDNA |
| <i>RT-Egr1-Rev</i>    | GGTTCAGGCCACAAAGTGTT    | cDNA |
| <i>RT-Irx3-For</i>    | TGGAACAGATCGCTGTAGTG    | cDNA |
| <i>RT-Irx3-Rev</i>    | TGGAAAGCTGTCTTGAGTAA    | cDNA |
| <i>RT-Csrp1-For</i>   | GCAACAGCTTCCATAAATCCT   | cDNA |
| <i>RT-Csrp1-Rev</i>   | CCATACTTCTTGCCGTAACAT   | cDNA |
| <i>RT-Lnpep-For</i>   | CTTGCTGGCTTGGGATTT      | cDNA |
| <i>RT-Lnpep-Rev</i>   | GGAGCCCAGATGGA ACTTAT   | cDNA |
| <i>Apoc2-F</i>        | TCAGCATGGATGAGAAAC      | cDNA |
| <i>Apoc2-R</i>        | CCCTCAGGAGAGTAAGGAG     | cDNA |
| <i>Cdon-F</i>         | GCCAACAGAGCACCATAC      | cDNA |
| <i>Cdon-R</i>         | CTCTACCATCTGCCATTA      | cDNA |
| <i>Zmiz1-F</i>        | CGCCATCAAGGTGTCTCT      | cDNA |
| <i>Zmiz1-R</i>        | CCTCGCTCACAATTCAGT      | cDNA |

Supplementary Table 2 RNA transcripts altered by loss of MeCP2 (P<0.0005)

| Gene Symbol          | Gene Title                        | Fold change( <b>red-</b> , <b>black+</b> ) |
|----------------------|-----------------------------------|--------------------------------------------|
| <i>1200009O22Rik</i> | <b>RIKEN cDNA 1200009O22 gene</b> | <b>1.3199861</b>                           |
| <i>2010001J22Rik</i> | <b>RIKEN cDNA 2010001J22 gene</b> | <b>1.6032917</b>                           |
| <i>2410004P03Rik</i> | <b>RIKEN cDNA 2410004P03 gene</b> | <b>1.3122652</b>                           |
| <i>2610017I09Rik</i> | <b>RIKEN cDNA 2610017I09 gene</b> | <b>1.2281135</b>                           |
| <i>2610207I05Rik</i> | <b>RIKEN cDNA 2610207I05 gene</b> | <b>1.2685544</b>                           |

|                      |                                                                                                       |           |
|----------------------|-------------------------------------------------------------------------------------------------------|-----------|
| <i>2810029C07Rik</i> | RIKEN cDNA 2810029C07 gene                                                                            | 1.3075414 |
| <i>3100002J23Rik</i> | RIKEN cDNA 3100002J23 gene                                                                            | 2.5638082 |
| <i>3110003A17Rik</i> | RIKEN cDNA 3110003A17 gene                                                                            | 1.2434744 |
| <i>3110035E14Rik</i> | RIKEN cDNA 3110035E14 gene                                                                            | 1.8093741 |
| <i>4930579J09Rik</i> | RIKEN cDNA 4930579J09 gene                                                                            | 2.1873207 |
| <i>9230110C19Rik</i> | RIKEN cDNA 9230110C19 gene                                                                            | 1.4008421 |
| <i>A830059I20Rik</i> | RIKEN cDNA A830059I20 gene                                                                            | 1.2406968 |
| <i>Aard</i>          | alanine and arginine rich domain containing protein                                                   | 1.2112767 |
| <i>AB124611</i>      | cDNA sequence AB124611                                                                                | 1.448705  |
| <i>AI504432</i>      | expressed sequence AI504432                                                                           | 1.5371199 |
| <i>AI662270</i>      | expressed sequence AI662270                                                                           | 1.5409324 |
| <i>AI987986</i>      | expressed sequence AI987986                                                                           | 2.488317  |
| <i>AK220484</i>      | cDNA sequence AK220484                                                                                | 1.2608101 |
| <i>Aldoc</i>         | aldolase 3, C isoform                                                                                 | 1.2304002 |
| <i>Alox5ap</i>       | arachidonate 5-lipoxygenase activating protein                                                        | 1.2686576 |
| <i>Anxa1</i>         | annexin A1                                                                                            | 1.3014349 |
| <i>Anxa3</i>         | annexin A3                                                                                            | 1.2547553 |
| <i>Apoc2</i>         | apolipoprotein C-II                                                                                   | 1.4037249 |
| <i>Arhgdib</i>       | Rho, GDP dissociation inhibitor (GDI) beta                                                            | 1.2733324 |
| <i>Armc3</i>         | armadillo repeat containing 3                                                                         | 1.4237647 |
| <i>BB146404</i>      | expressed sequence BB146404                                                                           | 1.3245964 |
| <i>Bbox1</i>         | butyrobetaine (gamma), 2-oxoglutarate dioxygenase 1 (gamma-butyrobetaine hydroxylase)                 | 2.3494308 |
| <i>Brunol4</i>       | bruno-like 4, RNA binding protein (Drosophila)                                                        | 1.5389663 |
| <i>Clr</i>           | complement component 1, r subcomponent                                                                | 1.34145   |
| <i>C3</i>            | complement component 3                                                                                | 1.788378  |
| <i>C530044C16Rik</i> | RIKEN cDNA C530044C16 gene                                                                            | 1.4980309 |
| <i>Ccdc114</i>       | coiled-coil domain containing 114                                                                     | 1.48653   |
| <i>Cd74</i>          | CD74 antigen (invariant polypeptide of major histocompatibility complex, class II antigen-associated) | 1.8498335 |
| <i>Cdon</i>          | cell adhesion molecule-related/down-regulated by oncogenes                                            | 1.287501  |
| <i>Cep68</i>         | centrosomal protein 68                                                                                | 1.2702885 |

|                           |                                                               |            |
|---------------------------|---------------------------------------------------------------|------------|
| <i>Cnot6l</i>             | CCR4-NOT transcription complex, subunit 6-like                | 1.3137585  |
| <i>Cntn1</i>              | contactin 1                                                   | 1.56654885 |
| <i>Crh</i>                | corticotropin releasing hormone                               | 1.3553226  |
| <i>Csrp1</i>              | cysteine and glycine-rich protein 1                           | 1.2579842  |
| <i>D0H4S114</i>           | DNA segment, human D4S114                                     | 1.3495843  |
| <i>D2Bwg1423e</i>         | DNA segment, Chr 2, Brigham & Women's Genetics 1423 expressed | 1.2273129  |
| <i>D730040F13Rik</i>      | RIKEN cDNA D730040F13 gene                                    | 1.3859867  |
| <i>Dkc1</i>               | dyskeratosis congenita 1, dyskerin homolog (human)            | 1.2359445  |
| <i>Dlc1</i>               | deleted in liver cancer 1                                     | 1.2275105  |
| <i>Dpyd</i>               | dihydropyrimidine dehydrogenase                               | 1.3387924  |
| <i>Dpysl4</i>             | dihydropyrimidinase-like 4                                    | 1.3475349  |
| <i>Efcab1</i>             | EF hand calcium binding domain 1                              | 1.6479905  |
| <i>EG232599</i>           | predicted gene, EG232599                                      | 1.3447968  |
| <i>EG633640</i>           | predicted gene, EG633640                                      | 1.2745947  |
| <i>Egr1</i>               | early growth response 1                                       | 2.5555215  |
| <i>ENSMUSG00000073624</i> | predicted gene, ENSMUSG00000073624                            | 1.2233759  |
| <i>Fbxo16</i>             | F-box protein 16                                              | 1.2158778  |
| <i>Fgf1</i>               | fibroblast growth factor 1                                    | 1.4074056  |
| <i>Fgfbp3</i>             | fibroblast growth factor binding protein 3                    | 1.5394058  |
| <i>Folr1</i>              | folate receptor 1 (adult)                                     | 1.2304002  |
| <i>Fos</i>                | FBJ osteosarcoma oncogene                                     | 2.5012958  |
| <i>Fzd5</i>               | frizzled homolog 5 (Drosophila)                               | 1.2929868  |
| <i>Gabrg1</i>             | gamma-aminobutyric acid (GABA-A) receptor, subunit gamma 1    | 1.473107   |
| <i>Gp1bb</i>              | glycoprotein Ib, beta polypeptide                             | 1.2529976  |
| <i>Gria1</i>              | glutamate receptor, ionotropic, AMPA1 (alpha 1)               | 1.6154985  |
| <i>H3f3b</i>              | H3 histone, family 3B                                         | 2.0970328  |
| <i>Hist1h3f</i>           | histone cluster 1, H3f                                        | 3.3159595  |
| <i>Icam1</i>              | intercellular adhesion molecule 1                             | 1.2555484  |
| <i>Ide</i>                | insulin degrading enzyme                                      | 1.5247848  |
| <i>Ier2</i>               | immediate early response 2                                    | 1.703028   |
| <i>Igfbp4</i>             | insulin-like growth factor binding protein 4                  | 1.2463028  |
| <i>Il13ra1</i>            | interleukin 13 receptor, alpha 1                              | 1.345369   |
| <i>Impact</i>             | imprinted and ancient                                         | 1.3830662  |

|                       |                                                                                        |                  |
|-----------------------|----------------------------------------------------------------------------------------|------------------|
| <b><i>Irx3</i></b>    | <b>Iroquois related homeobox 3 (Drosophila)</b>                                        | <b>2.0480883</b> |
| <i>Itga1</i>          | integrin alpha 1                                                                       | 1.2823926        |
| <b><i>Josd3</i></b>   | <b>Josephin domain containing 3</b>                                                    | <b>1.2856086</b> |
| <b><i>Jun</i></b>     | <b>Jun oncogene</b>                                                                    | <b>1.2348865</b> |
| <i>Lcn2</i>           | lipocalin 2                                                                            | 3.0081117        |
| <i>Limd2</i>          | LIM domain containing 2                                                                | 1.23241          |
| <i>Lipa</i>           | lysosomal acid lipase A                                                                | 1.2705736        |
| <i>Lnpep</i>          | leucyl/cystinyl aminopeptidase                                                         | 1.2049991        |
| <i>Lrrfip1</i>        | leucine rich repeat (in FLII) interacting protein 1                                    | 1.2164135        |
| <i>Lyz2</i>           | lysozyme 2                                                                             | 1.4264934        |
| <b><i>Megf11</i></b>  | <b>multiple EGF-like-domains 11</b>                                                    | <b>1.824104</b>  |
| <i>Mpp7</i>           | membrane protein, palmitoylated 7 (MAGUK p55 subfamily member 7)                       | 1.4092764        |
| <i>Ms4a6b</i>         | membrane-spanning 4-domains, subfamily A, member 6B                                    | 1.2856375        |
| <i>Ms4a6c</i>         | membrane-spanning 4-domains, subfamily A, member 6C                                    | 1.2334442        |
| <i>Msr1</i>           | macrophage scavenger receptor 1                                                        | 1.3455842        |
| <i>Ncf2</i>           | neutrophil cytosolic factor 2                                                          | 1.2654923        |
| <b><i>Ndn</i></b>     | <b>necdin</b>                                                                          | <b>1.2235967</b> |
| <b><i>Nkain4</i></b>  | <b>Na<sup>+</sup>/K<sup>+</sup> transporting ATPase interacting 4</b>                  | <b>1.2680174</b> |
| <i>Osmr</i>           | oncostatin M receptor                                                                  | 1.3199704        |
| <b><i>Pcdh17</i></b>  | <b>protocadherin 17</b>                                                                | <b>1.3092897</b> |
| <b><i>Pcgf6</i></b>   | <b>polycomb group ring finger 6</b>                                                    | <b>1.2167385</b> |
| <b><i>Pde1b</i></b>   | <b>phosphodiesterase 1B, Ca<sup>2+</sup>-calmodulin dependent</b>                      | <b>1.3068185</b> |
| <i>Pdgfb</i>          | platelet derived growth factor, B polypeptide                                          | 1.371351         |
| <i>Phldb2</i>         | pleckstrin homology-like domain, family B, member 2                                    | 1.2069079        |
| <i>Pld4</i>           | phospholipase D family, member 4                                                       | 1.2251571        |
| <i>Plekhm2</i>        | pleckstrin homology domain containing, family M (with RUN domain) member 2             | 1.2004919        |
| <b><i>Podxl</i></b>   | <b>podocalyxin-like</b>                                                                | <b>1.2564828</b> |
| <b><i>Ppp2r2b</i></b> | <b>protein phosphatase 2 (formerly 2A), regulatory subunit B (PR 52), beta isoform</b> | <b>1.2065306</b> |

|                 |                                                                                            |                  |
|-----------------|--------------------------------------------------------------------------------------------|------------------|
| <i>Psat1</i>    | <b>phosphoserine aminotransferase 1</b>                                                    | <b>1.2030232</b> |
| <i>Ptpn18</i>   | <b>protein tyrosine phosphatase, non-receptor type 18</b>                                  | <b>1.2513112</b> |
| <i>Rab39b</i>   | <b>RAB39B, member RAS oncogene family</b>                                                  | <b>6.9517465</b> |
| <i>Ror1</i>     | <b>receptor tyrosine kinase-like orphan receptor 1</b>                                     | <b>1.2083408</b> |
| <i>Rshl3</i>    | <b>radial spokehead-like 3</b>                                                             | <b>1.3681484</b> |
| <i>Sec61a2</i>  | <b>Sec61, alpha subunit 2 (S. cerevisiae)</b>                                              | <b>1.2063156</b> |
| <i>SEPT3</i>    | <b>septin 3</b>                                                                            | <b>1.2298033</b> |
| <i>Slc10a3</i>  | <b>solute carrier family 10 (sodium/bile acid cotransporter family), member 3</b>          | <b>1.4384748</b> |
| <i>Slc11a1</i>  | <b>solute carrier family 11 (proton-coupled divalent metal ion transporters), member 1</b> | <b>1.2547054</b> |
| <i>Slc16a13</i> | <b>solute carrier family 16 (monocarboxylic acid transporters), member 13</b>              | <b>1.2162495</b> |
| <i>Slc38a1</i>  | <b>solute carrier family 38, member 1</b>                                                  | <b>1.2346531</b> |
| <i>Stard5</i>   | <b>StAR-related lipid transfer (START) domain containing 5</b>                             | <b>1.2607622</b> |
| <i>Stk10</i>    | <b>serine/threonine kinase 10</b>                                                          | <b>1.2168632</b> |
| <i>Syn2</i>     | <b>synapsin II</b>                                                                         | <b>1.77414</b>   |
| <i>Tm4sf1</i>   | <b>transmembrane 4 superfamily member 1</b>                                                | <b>1.234867</b>  |
| <i>Tns1</i>     | <b>tensin 1</b>                                                                            | <b>1.2124377</b> |
| <i>Tspan13</i>  | <b>tetraspanin 13</b>                                                                      | <b>1.3430191</b> |
| <i>Zcche3</i>   | <b>zinc finger, CCHC domain containing 3</b>                                               | <b>1.2078353</b> |
| <i>Zfhx3</i>    | <b>zinc finger homeobox 3</b>                                                              | <b>1.4186854</b> |
| <i>Zfp36</i>    | <b>zinc finger protein 36</b>                                                              | <b>1.4568895</b> |
| <i>Zfp592</i>   | <b>zinc finger protein 592</b>                                                             | <b>1.2114612</b> |
| <i>Zmiz1</i>    | <b>zinc finger, MIZ-type containing 1</b>                                                  | <b>1.3575476</b> |
| <i>Mecp2</i>    | <b>methyl CpG binding protein 2</b>                                                        | <b>34.74993</b>  |

**Supplementary Table 3 primers used for ChIP-seq validation**

| <i>Name</i>        | <b>Sequence</b>      | <b>Type</b> |
|--------------------|----------------------|-------------|
| <i>Aard-For</i>    | AAAACAACCCAGACGGACAG | ChIP-PCR    |
| <i>Aard-Rev</i>    | TACACACCCAGAAGCACGAG | ChIP-PCR    |
| <i>Slc38a1-For</i> | CCACACTTCGACATCACCAG | ChIP-PCR    |
| <i>Slc38a1-Rev</i> | GTGCAGATTGCAGAGCTGAG | ChIP-PCR    |
| <i>Armc3-For</i>   | AACACGAGGCATTCTCCAAC | ChIP-PCR    |
| <i>Armc3-Rev</i>   | TCAACGATCTCATCCAGGTG | ChIP-PCR    |
